# Supplementary material for: Rechargeable Mg–M (M = Li, Na and K) dual-metal–ion batteries based on a Berlin green cathode and a metallic Mg anode
Source: Royal Society of Chemistry journal article supplement (doi:10.1039/c9cp03836a), 2019-01-01
Supplement: c9cp03836a1.pdf [file c9cp03836a1.pdf]

## Supporting information

### **Rechargeable Mg-M (M = Li, Na and K) dual-metal-ion batteries based on Berlin green cathode and metallic Mg anode**

Yujie Zhang<sup>a</sup>, Jingwei Shen<sup>a</sup>, Xue Li<sup>a</sup>, Zhongxue Chen<sup>a</sup>, Shun-an Cao<sup>a</sup>,

Ting Li<sup>\*b</sup>, Fei Xu<sup>\*a</sup>

<sup>a</sup> Key Laboratory of Hydraulic Machinery Transients, Ministry of Education, School of Power and Mechanical Engineering, Wuhan University, Wuhan 430072, China.

<sup>b</sup> Key Laboratory of Catalysis and Materials Science of the State Ethnic Affairs Commission & Ministry of Education, College of Chemistry and Materials Science, South-Central University for Nationalities, Wuhan 430074, China.

\*Correspondence:

Fei Xu (xufei2058@whu.edu.cn)

Ting Li (liting@mail.scuec.edu.cn)



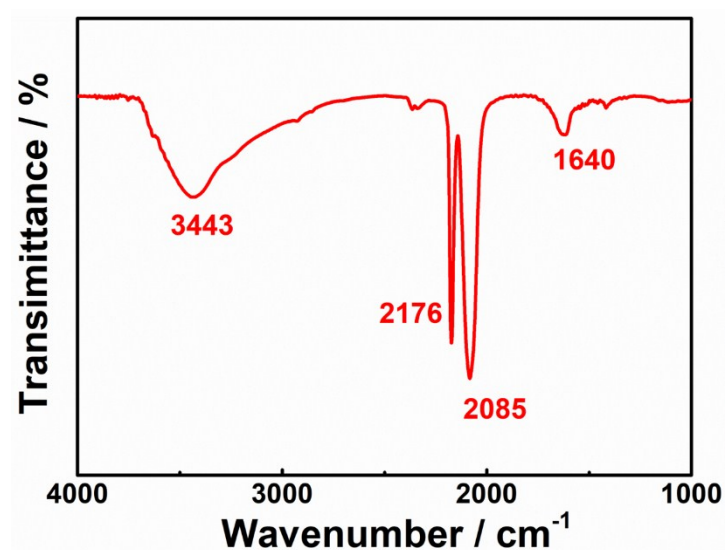

**Fig. S1** FT-IR spectra of the  $\text{FeFe}(\text{CN})_6$  sample.



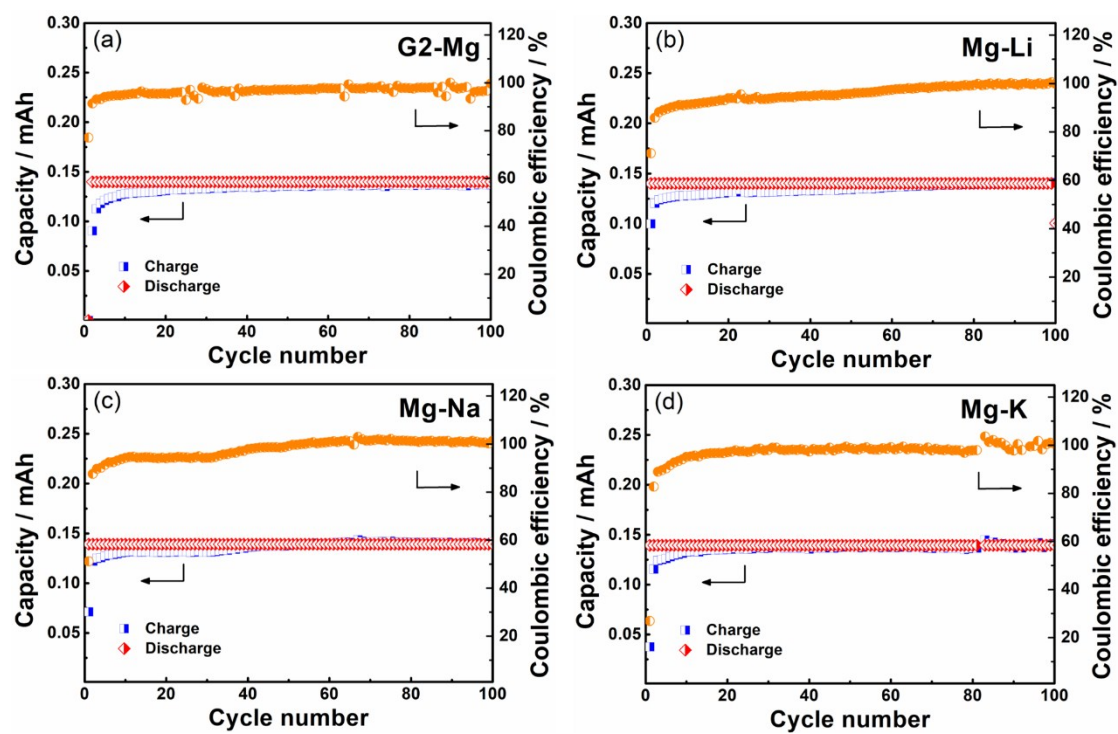

**Fig. S2** Cycling efficiencies of Mg deposition/dissolution in (a)  $\text{Mg}^{2+}$ , (b)  $\text{Mg}^{2+}/\text{Li}^+$ , (c)  $\text{Mg}^{2+}/\text{Na}^+$  and (d)  $\text{Mg}^{2+}/\text{K}^+$  electrolytes.



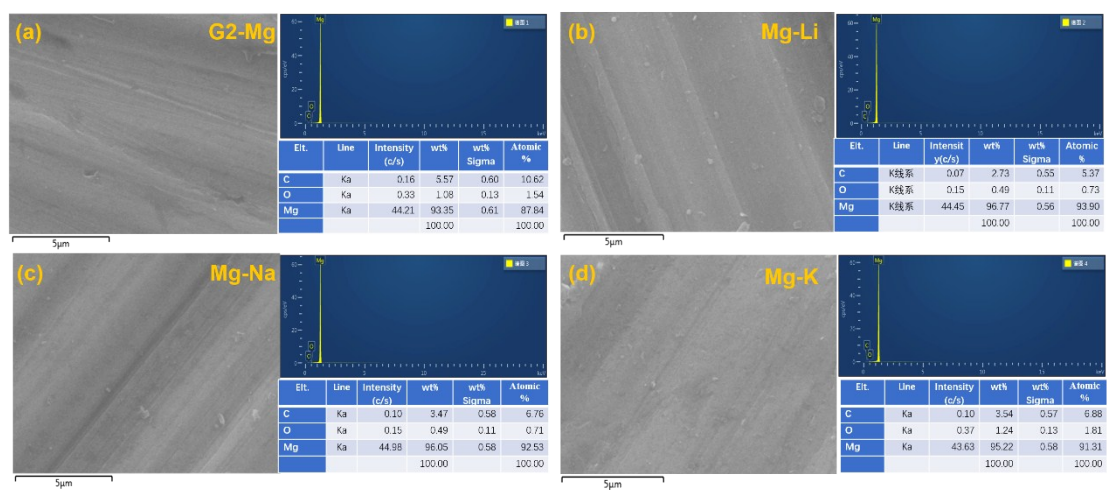

**Fig. S3** SEM images and corresponding EDS spectra of Mg foils after 20 cycles in (a) Mg-HMDS, (b) Mg-Li, (c) Mg-Na and (d) Mg-K electrolytes.



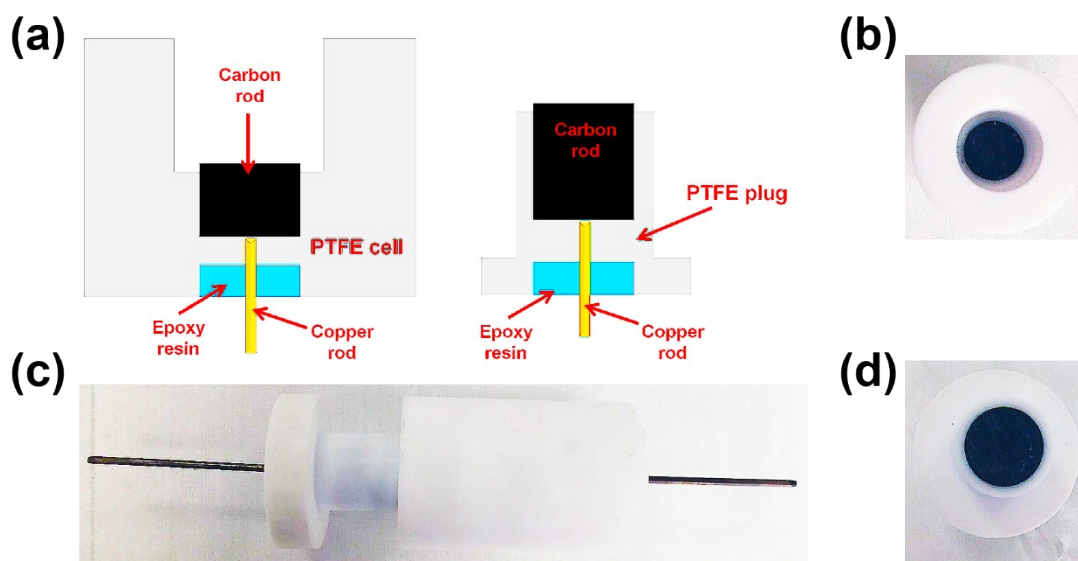

**Fig. S4** (a) Schematic drawing and (b, c, d) photos of the lab-made PTFE cell for Mg battery tests. The cell is made of customer-designed PTFE cell body and carbon rod electrode (with a copper rod inserted in). Epoxy resin is used to fix the carbon electrode and seal the crack. PTFE tape is used for the sealing during the Mg cell fabrication.



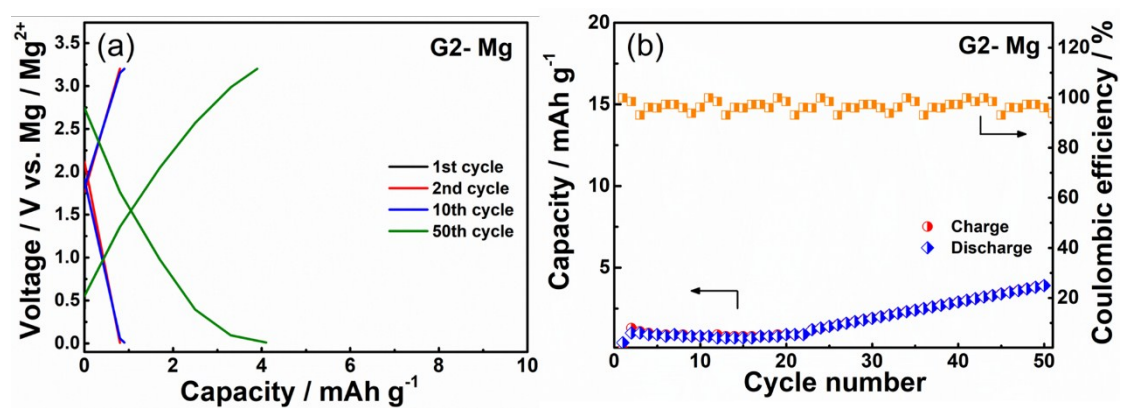

**Fig. S5** (a) Discharge/charge profiles of  $\text{FeFe}(\text{CN})_6$  electrode in  $\text{Mg}^{2+}$  electrolyte at a current density of  $50 \text{ mA g}^{-1}$  and (b) corresponding cycling performance for the initial 50 cycles.
